# Supplementary material for: Anthropometric Measurements and Admission Parameters as Predictors of Acute Respiratory Distress Syndrome in Hospitalized COVID-19 Patients
Source: MDPI journal article supplement (doi:10.3390/biomedicines11041199), 2023-04-18
Supplement: s1 [file s1]

Supplementary Table S1. Flowchart of patient enrolment

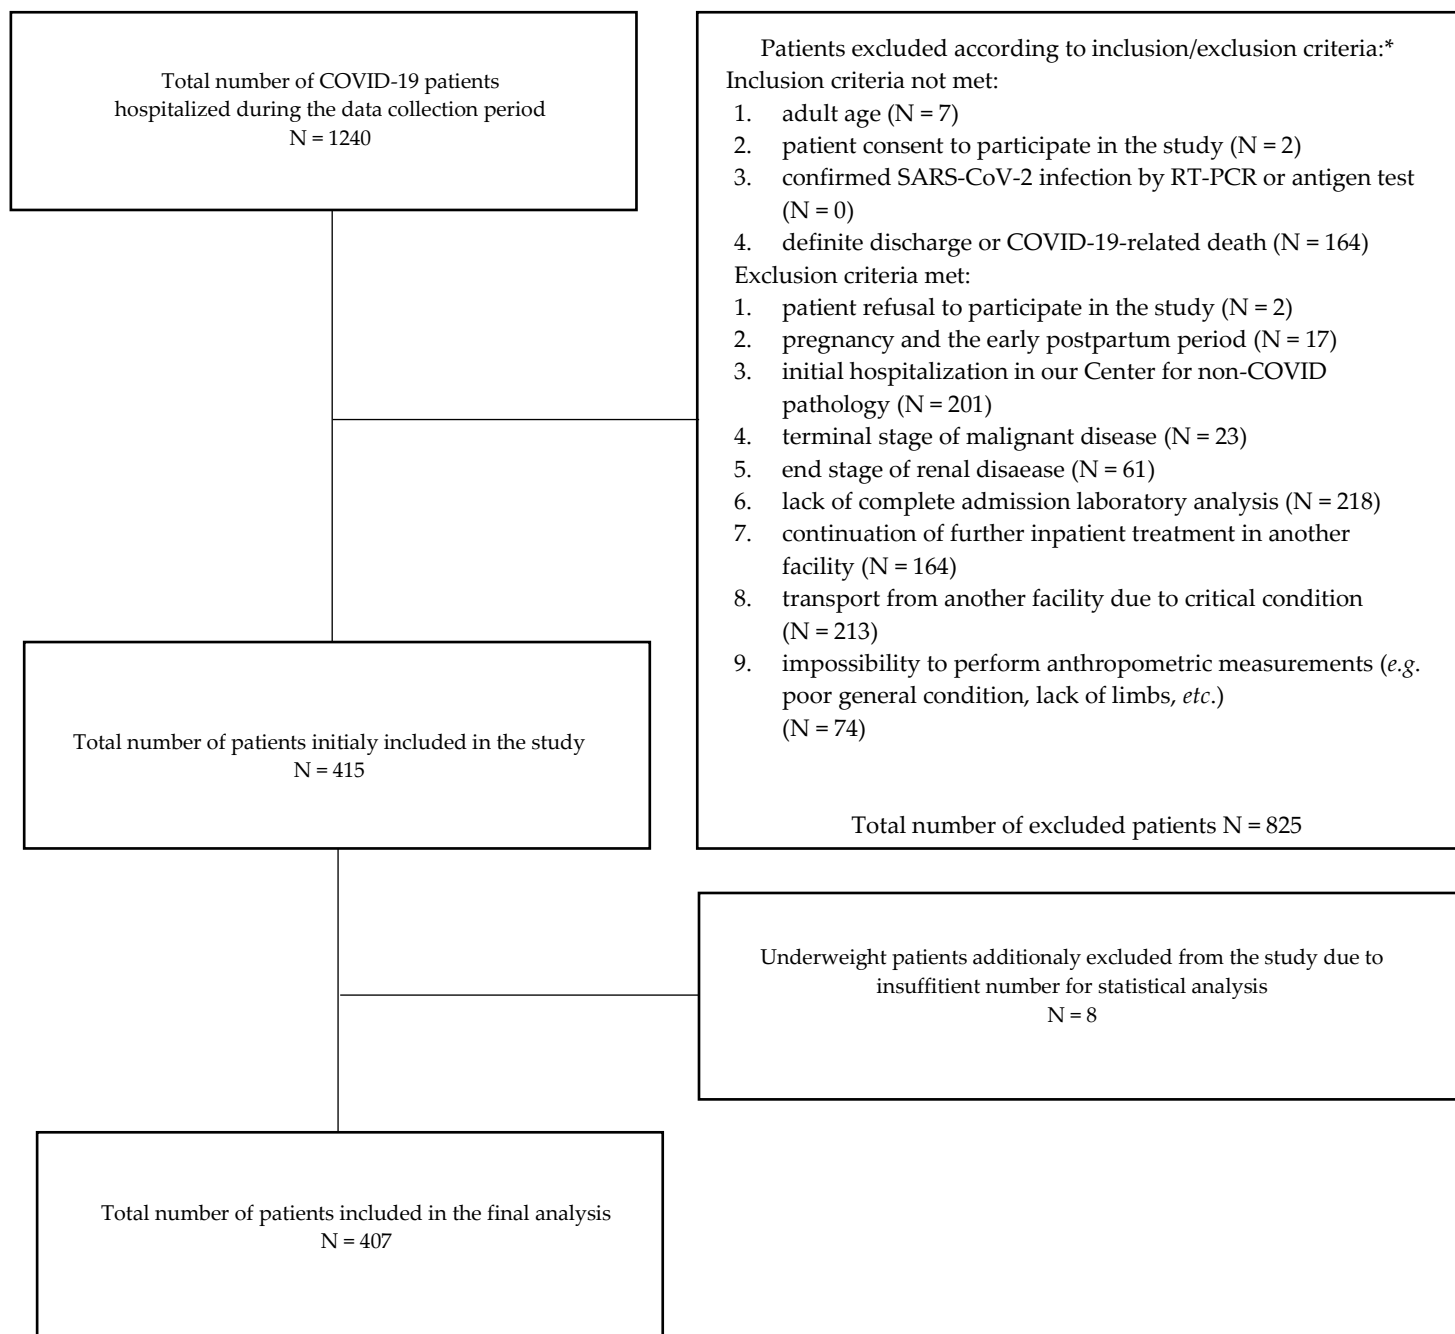

\* some patients had more than one exclusion criteria present.

Supplementary Table S2. Threshold values for continuous variables, according to the ROC analysis or laboratory reference lines.

| Parameter                        | Threshold Value | AUC (CI)                         | „p“ value |
|----------------------------------|-----------------|----------------------------------|-----------|
| SaO2 [%]                         | 87.5            | 0.763 (0.713-0.812)              | < 0.001*  |
| PaO2 [kPa]                       | 6.85            | 0.718 (0.665-0.771)              | < 0.001*  |
| Lymphocytes [10 <sup>9</sup> /L] | 1.2             | <i>Laboratory reference line</i> |           |
| LDH [U/L]                        | 793.5           | 0.667 (0.612-0.723)              | < 0.001*  |
| CK [U/L]                         | 171             | <i>Laboratory reference line</i> |           |
| CRP [mg/L]                       | 107.5           | 0.578 (0.520-0.636)              | 0.009*    |
| Age [years]                      | 68.5            | 0.582 (0.524-0.640)              | 0.006*    |
| IL-6 [pg/mL]                     | 59.75           | 0.639 (0.584-0.694)              | < 0.001*  |

Abbreviations: AUC - area under the curve; CI - confidence interval; CK - creatine kinase; CRP - c reactive protein; IL-6 - interleukin 6; LDH - lactate dehydrogenase; PaO2 - Partial pressure of oxygen; ROC - receiver operating characteristics curve; SaO2 - oxygen saturation of blood;

\* - statistical significance level at < 0.05.
